# Supplementary material for: The integral spliceosomal component CWC15 is required for development in Arabidopsis
Source: PubMed Central journal article supplement (PMC7415139; doi:10.1038/s41598-020-70324-3), 2020-08-07

*Actin 2*

*AT3G13190*

*CWC15*

*AT3G13210*

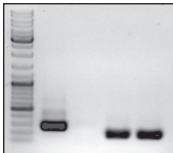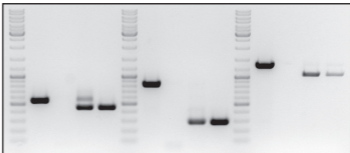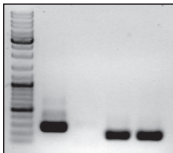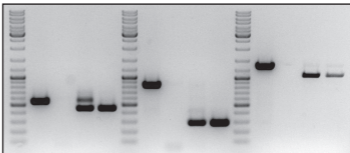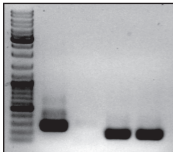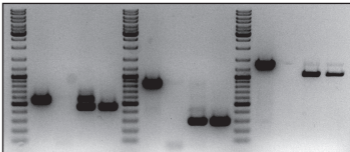

Supplement: 41598_2020_70324_MOESM6_ESM.pdf [file 41598_2020_70324_MOESM6_ESM.pdf]
