# Supplementary material for: The integral spliceosomal component CWC15 is required for development in Arabidopsis
Source: PubMed Central journal article supplement (PMC7415139; doi:10.1038/s41598-020-70324-3), 2020-08-07

**A**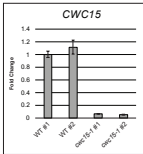**B**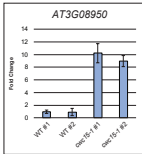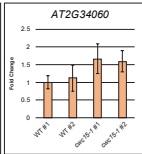

Supplement: 41598_2020_70324_MOESM7_ESM.pdf [file 41598_2020_70324_MOESM7_ESM.pdf]
