# Supplementary material for: The integral spliceosomal component CWC15 is required for development in Arabidopsis
Source: PubMed Central journal article supplement (PMC7415139; doi:10.1038/s41598-020-70324-3), 2020-08-07
Supplement: 41598_2020_70324_MOESM14_ESM.pdf [file 41598_2020_70324_MOESM14_ESM.pdf]

| Phylum           | Species name                         |
|------------------|--------------------------------------|
| Flowering plants | <i>Arabidopsis thaliana</i>          |
| Liverworts       | <i>Marchantia polymorpha</i>         |
| Mosses           | <i>Physcomitrella patens</i>         |
| Green algae      | <i>Chlamydomonas reinhardtii</i>     |
| Red algae        | <i>Chondria crispus</i>              |
| Ciliates         | <i>Stybrnychia lemnae</i>            |
| Fungi            | <i>Schizosaccharomyces pombe</i>     |
| Sponges          | <i>Amphimedon queenslandica</i>      |
| Nematodes        | <i>Caenorhabditis elegans</i>        |
| Corals           | <i>Acropora digitifera</i>           |
| Mollusca         | <i>Octopus bimaculoides</i>          |
| Cnidarians       | <i>Hydra vulgaris</i>                |
| Lancelets        | <i>Branchiostoma belcheri</i>        |
| Echinoderms      | <i>Strongylocentrotus purpuratus</i> |
| Arthropods       | <i>Drosophila melanogaster</i>       |
| Sharks           | <i>Callorhynchus milii</i>           |
| Fish             | <i>Danio rerio</i>                   |
| Coelacanth       | <i>Lampris chalumnae</i>             |
| Amphibians       | <i>Xenopus tropicalis</i>            |
| Reptiles         | <i>Anolis carolinensis</i>           |
| Birds            | <i>Fulmarus glacialis</i>            |
| Mammals          | <i>Homo sapiens</i>                  |
