# Supplementary material for: The integral spliceosomal component CWC15 is required for development in Arabidopsis
Source: PubMed Central journal article supplement (PMC7415139; doi:10.1038/s41598-020-70324-3), 2020-08-07
Supplement: 41598_2020_70324_MOESM15_ESM.pdf [file 41598_2020_70324_MOESM15_ESM.pdf]

| Homo sapiens           | Arabidopsis thaliana | AGI locus | UniProt ID | Peptides | Sequence coverage [%] | Score  | Intensity   | MS/MS Count |
|------------------------|----------------------|-----------|------------|----------|-----------------------|--------|-------------|-------------|
| <b>US snRNP</b>        |                      |           |            |          |                       |        |             |             |
| Brr2                   | BRR2/MAC14/EMB1507   | AT1G20960 | Q48534     | 29       | 14.6                  | 79,507 | 444470000   | 43          |
| US-40                  | MAC17                | AT2G43770 | O22B26     | 5        | 17.8                  | 8,6494 | 59862000    | 5           |
| Prp8                   | PRP8B                | AT4G38780 | Q95SD2     | 23       | 9.4                   | 58,79  | 292690000   | 31          |
| Snu114                 | GFA1/MEE5/CLO        | AT1G06220 | Q9LNC5     | 14       | 17.7                  | 64,336 | 266600000   | 19          |
| <b>US sm ring</b>      |                      |           |            |          |                       |        |             |             |
| Sm B/B'                |                      | A75G44500 | Q9FH15     | 2        | 5.9                   | 3,1189 | 14232000    | 2           |
| Sm D2                  |                      | A73G62840 | Q8RUH0     |          |                       |        |             |             |
|                        |                      | A72G47640 | Q8RUH0     |          |                       |        |             |             |
| Sm D1                  | SmD1a                | A73G07590 | Q959F1     |          |                       |        |             |             |
|                        | SmD1b                | A74G02840 | Q95Y09     |          |                       |        |             |             |
| Sm D3                  |                      | AT1G20580 | Q9LMS2     |          |                       |        |             |             |
| Sm E                   |                      | A72G18740 | Q9ZV45     | 1        | 14.1                  | 10,073 | 10818000    | 1           |
| Sm F                   | RUXF                 | A74G30220 | F4JPK5     |          |                       |        |             |             |
| Sm G                   |                      | A72G23930 | O82221     | 1        | 22.4                  | 3,2787 | 5851700     | 1           |
|                        |                      | A73G11500 | Q9CAX7     |          |                       |        |             |             |
| <b>NTC</b>             |                      |           |            |          |                       |        |             |             |
| Cdc5                   | CDC5/MAC1            | AT1G09770 | P92948     | 18       | 21.6                  | 39,897 | 228190000   | 19          |
| Prp19                  | MAC3A                | AT1G04510 | F4EP3      | 12       | 27                    | 32,736 | 130360000   | 10          |
|                        | MAC3B                | A72G33340 | O22785     | 12       | 28.8                  | 57,663 | 448850000   | 14          |
| Sp127                  | MOS4                 | A73G18165 | Q94959     | 1        | 4.3                   | 3,2363 | 17435000    | 1           |
| Syl1                   | MAC9                 | A75G28740 | Q9LKL3     | 14       | 15.9                  | 33,249 | 171140000   | 14          |
| Syl2                   |                      | A72G16860 | Q9ZVX7     |          |                       |        |             |             |
| Syl3                   | MAC10                | A75G41770 | F4JZK8     | 13       | 16.3                  | 16,361 | 138040000   | 11          |
| lay1                   | MAC1                 | A73G18790 | Q9L597     | 1        | 3.7                   | 1,3055 | 3306300     | 1           |
| CTNBNL1                |                      | A73G02710 | A3KPF3     |          |                       |        |             |             |
| HSP73                  | HSP70                | A73G09440 | O65719     | 21       | 32.7                  | 33,405 | 111960000   | 13          |
| <b>NTR</b>             |                      |           |            |          |                       |        |             |             |
| RBM22                  | MAC5A                | AT1G07360 | Q9LNV5     | 6        | 12.5                  | 26,372 | 42295000    | 6           |
| SKIP                   | SKIP                 | AT1G77180 | O80653     | 8        | 15.3                  | 30,515 | 91681000    | 8           |
| G10                    |                      | A74G21110 | O49553     | 1        | 11                    | 14,075 | 4845200     | 1           |
| PPL1                   |                      | A72G36130 | Q95H1      |          |                       |        |             |             |
| Ad-002                 | CWC15                | A73G13200 | Q9LKS2     | 26       | 61.3                  | 304.66 | 18999000000 | 56          |
| PRL1                   | PRL1                 | A74G15900 | Q42384     | 6        | 15.8                  | 18,683 | 43612000    | 7           |
| Aquarius               | EMB2765              | A72G38770 | Q8L5Y4     | 12       | 8.9                   | 28,811 | 122810000   | 12          |
| <b>Splicing Factor</b> |                      |           |            |          |                       |        |             |             |
| SRRM2/SRm300           |                      | A73G49601 | B3H6J5     |          |                       |        |             |             |
| Cwc22                  |                      | AT1G80930 | Q9SAG7     | 1        | 1.2                   | 1,4812 | 1191100     | 1           |
| RNF113A                |                      | A75G06420 | Q9FNG6     |          |                       |        |             |             |
|                        |                      | A71G01350 | Q8GK84     |          |                       |        |             |             |
| Prp2                   | EMB2733/ESP3         | AT1G32490 | Q8VY00     |          |                       |        |             |             |
| Prp17                  |                      | AT1G10580 | A4FVN8     | 4        | 7.9                   | 9,6605 | 34635000    | 4           |
