# Supplementary material for: The integral spliceosomal component CWC15 is required for development in Arabidopsis
Source: PubMed Central journal article supplement (PMC7415139; doi:10.1038/s41598-020-70324-3), 2020-08-07
Supplement: 41598_2020_70324_MOESM16_ESM.pdf [file 41598_2020_70324_MOESM16_ESM.pdf]

**Parental genotype****F1 genotype**

| ♀                            | ♂                            | het % (n) | WT % (n)   | Σ   |
|------------------------------|------------------------------|-----------|------------|-----|
| <i>cwc15-2<sup>del</sup></i> | WT                           | 29.2 (78) | 70.8 (189) | 267 |
| WT                           | <i>cwc15-2<sup>del</sup></i> | 48.3 (73) | 51.7 (78)  | 151 |
