# Supplementary material for: The integral spliceosomal component CWC15 is required for development in Arabidopsis
Source: PubMed Central journal article supplement (PMC7415139; doi:10.1038/s41598-020-70324-3), 2020-08-07
Supplement: 41598_2020_70324_MOESM17_ESM.pdf [file 41598_2020_70324_MOESM17_ESM.pdf]

|                                |                                            |
|--------------------------------|--------------------------------------------|
| cwc15-1 genotyping start       | 5'-TTGGGACTCTAGCTTAGAGTCAAGCA-3'           |
| cwc15-1 genotyping stop        | 5'-ATGGACGAGCTGTACAAGTAAAGAT-3'            |
| LB                             | 5'-CTGAGAGTTCCTGGTGGTCTTACTT-3'            |
| RB                             | 5'-TQCTGCAGTGGTCACTTCAGAAAA-3'             |
| cwc15-2 RP                     | 5'-AGATACTTAGAGAAGGCGGAGAGAG-3'            |
| cwc15-2 LP                     | 5'-GAGCTCTCCACATCTTCAGTTACCA-3'            |
| LibA1                          | 5'-GAGCTCTCCACATCTTCAGTTACCA-3'            |
| LBb1.3                         | 5'-ATTTTGGCGATTTCGGAAC-3'                  |
| CWC15-genomic start            | 5'-TATAGTGGACTAAGAGTGTGTGACTTCAGAGCTAG-3'  |
| CWC15-genomic stop             | 5'-TATATGATCAACACTTTCATGTATCTATGCGAGGA-3'  |
| CWC15-genomic -TGA stop        | 5'-TATA TGATCAACACTTTCATGTATCTATGCGAGGA-3' |
| CWC15-ODS start                | 5'-TATATGATCAATGACGACTGCGAGCAAGGAAACCT-3'  |
| CWC15-ODS stop                 | 5'-TATATGATCAACACTTTCATGTATCTATGCGAGGA-3'  |
| pAT3G10100 start               | 5'-TATACTGGAGGGTTTGGTGAAGAGGGACTT-3'       |
| pAT3G10100 stop                | 5'-TATACCGGGGGGTTTGGTGAAGAGGGACT-3'        |
| ACTIN2 (A73G18780) seqRT start | 5'-TGAGCAAAGAAATCACAGGCACCTTC-3'           |
| ACTIN2 (A73G18780) seqRT stop  | 5'-TCTGTGAADGATTCCGGACCTG-3'               |
| A73G13160 seqRT start          | 5'-CTTTGAGCGCTGGTATTTCTGGAGGA-3'           |
| A73G13160 seqRT stop           | 5'-CTTCAGATCTTCAATGGCTTGAATGA-3'           |
| CWC15 (A73G13200) seqRT start  | 5'-ATCTCCAGAAGTATTCGTCCCGTGTAT-3'          |
| CWC15 (A73G13200) seqRT stop   | 5'-GGTCACCTTTGATATCAACAACAG-3'             |
| A73G13210 seqRT start          | 5'-AGATACTTAGAGAAGGCGGAGAGAG-3'            |
| A73G13210 seqRT stop           | 5'-GAGCTCTCCACATCTTCAGTTACCA-3'            |
| LBQ10 (A74G26320) qPCR a       | 5'-GGCCCTGTATAATCCCTGATGAATAAG-3'          |
| LBQ10 (A74G26320) qPCR aa      | 5'-AAAGAGATAACAGGAACGGAAACATAGT -3'        |
| CWC15 (A73G13200) qPCR a       | 5'-CAGATGGGAAGAGCTAAACGC-3'                |
| CWC15 (A73G13200) qPCR aa      | 5'-ACATCATCATCCACCTCC-3'                   |
| A73G28950 qPCR a               | 5'-GTCCCGATATCTGTGCTGAGG-3'                |
| A73G28950 qPCR aa              | 5'-CCCTTAGAGGAAAAATCTCCAAATGT-3'           |
| A73G4080 qPCR a                | 5'-GAAACTCTGGTGGTTCGG-3'                   |
| A73G4080 qPCR aa               | 5'-TAGCTATAGTGGCGCTGGCA-3'                 |
